# Supplementary material for: Exploring Students’ Descriptions of Mutation from a Cognitive Perspective Suggests How to Modify Instructional Approaches
Source: Atypon-hosted journal article supplement (doi:10.1187/cbe.18-11-0225), 2019-08-30
Supplement: combinedsupmats.pdf [file combinedsupmats.pdf]

# Supplemental Material

*CBE—Life Sciences Education*

Zhao and Schuchardt

Table A

*The distribution by question context of coded topic phrases, and the treatment of mutation*

| <u>Context</u> | <u>Coded topic phrase</u> |                    |                    | <u>Treatment of mutation</u>     |                                 |                          |
|----------------|---------------------------|--------------------|--------------------|----------------------------------|---------------------------------|--------------------------|
|                | <u>Cause</u>              | <u>Description</u> | <u>Propagation</u> | <u>Process-<br/>focused only</u> | <u>Entity-<br/>focused only</u> | <u>Dual-<br/>focused</u> |
| Lizard(N=30)   | 23                        | 16                 | 18                 | 2                                | 23                              | 5                        |
| Bacteria(N=34) | 25                        | 16                 | 15                 | 0                                | 32                              | 2                        |
| Total          | 48                        | 32                 | 33                 | 2                                | 55                              | 7                        |

*Note.* There was no significant difference between lizards and bacteria for coded topic phrases ( $\chi^2=0.35$ ,  $p = .84$ ), or treatment of mutation (Fisher exact test,  $p = .10$ ).
